# Supplementary material for: Exploring the epidemiology of disseminated intravascular coagulation: protocol for the DANish Disseminated Intravascular Coagulation (DANDIC) Cohort Study
Source: HighWire-hosted journal article supplement (doi:10.1136/bmjopen-2022-062623), 2022-07-01
Supplement: bmjopen-2022-062623supp001_data_supplement.pdf [file bmjopen-2022-062623supp001_data_supplement.pdf]

**eTable 1.** International System of Nomenclature, Properties, and Units (NPU system) used to identify the coagulation biomarkers in the study.

|                                |                                        |
|--------------------------------|----------------------------------------|
| Antithrombin                   | NPU10007, NPU18597, NPU18598, NPU29992 |
| Fibrinogen                     | NPU21536, NPU02050                     |
| International normalized ratio | NPU01685                               |
| Fibrin D-dimer                 | NPU19767, NPU28289                     |
| Platelet count levels          | NPU03568                               |

**eTable 2.** *International Classification of Diseases* (ICD) codes used to classify haematological malignancies.

|                                 |                                                                                     |
|---------------------------------|-------------------------------------------------------------------------------------|
| Hodgkin lymphoma                | C81                                                                                 |
| Non-Hodgkin lymphomas           | C82-C86, C88.0-9, C911b                                                             |
| Acute myeloid leukaemia         | C92 (excl. C921, C922, c927b), C930, C937, C939, C950                               |
| Acute lymphoid leukaemia        | C910                                                                                |
| Chronic myeloid leukaemia       | C921, C922                                                                          |
| Chronic lymphocytic leukaemia   | C911 excl. C911b                                                                    |
| Multiple myeloma                | C90.0                                                                               |
| Myeloproliferative neoplasms    | D473, D45, D471, D474                                                               |
| Myelodysplastic syndrome        | D46, C93 (except C930, C937, C939)                                                  |
| Other haematological malignancy | All other codes between C81-C96 not included in the above-mentioned classifications |

**eTable 3.** *International Classification of Diseases (ICD) codes used to classify liver disease.*

|                                                  |     |
|--------------------------------------------------|-----|
| Alcoholic liver disease                          | K70 |
| Toxic liver disease                              | K71 |
| Hepatic failure, not elsewhere classified        | K72 |
| Chronic hepatitis, not elsewhere classified      | K73 |
| Fibrosis and cirrhosis of liver                  | K74 |
| Other inflammatory liver disease                 | K75 |
| Other diseases of liver                          | K76 |
| Liver disorders in diseases classified elsewhere | K77 |
